# Supplementary material for: SERS-based immunoassay using a gold array-embedded gradient microfluidic chip
Source: Royal Society of Chemistry journal article supplement (doi:10.1039/c2lc40353f), 2012-01-01
Supplement: c2lc40353f.pdf [file c2lc40353f.pdf]

## Supporting Information

# SERS-based immunoassay using a gold array-embedded gradient microfluidic chip

Moonkwon Lee,<sup>†a</sup> Kangsun Lee,<sup>†b</sup> Ki Hyung Kim,<sup>a</sup>

Kwang W. Oh<sup>\*b</sup> and Jaebum Choo<sup>\*a</sup>

<sup>a</sup>*Department of Bionano Engineering, Hanyang University, Ansan 426-791, South Korea.*

*E-mail: [jbchoo@hanyang.ac.kr](mailto:jbchoo@hanyang.ac.kr)*

<sup>b</sup>*Department of Electrical Engineering, State University of New York at Buffalo, NY 14260,*

*USA. E-mail: [kwangoh@buffalo.edu](mailto:kwangoh@buffalo.edu)*

**†Joint first authors**

**\*Joint corresponding authors**

**Address for correspondence:**

**Jaebum Choo**

Telephone: +82-31-400-5201; Fax: +82-31-436-8188; E-mail: [jbchoo@hanyang.ac.kr](mailto:jbchoo@hanyang.ac.kr)

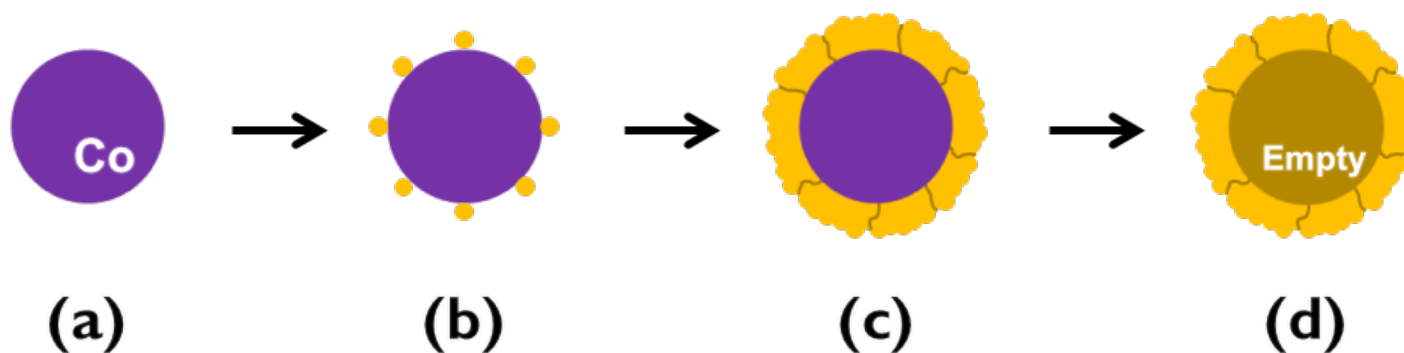

Figure S1. Fabrication process of hollow gold nanospheres (HGNs): (a) Synthesis of cobalt template, (b) Gold seeding, (c) Growth of the seeded gold, and (d) Oxidation of cobalt template and formation of HGN. A hollow interior is formed by dissolving the cobalt nanoparticle in the core.

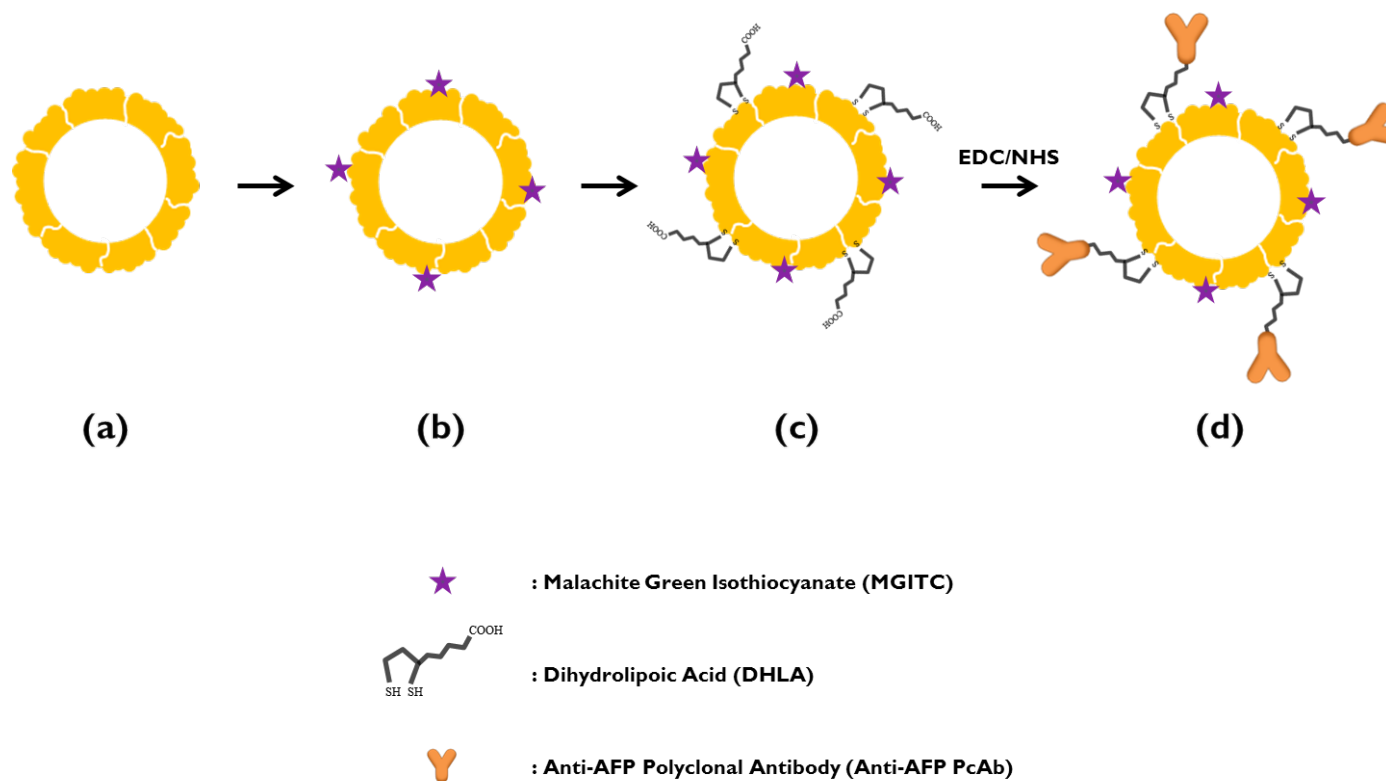

Figure S2. Antibody conjugation process on the fabricated hollow gold nanospheres (HGNs): (a) Fabricated HGN, (b) Adsorption of Raman reporter (Malachite green isothiocyanate, MGITC), (c) Activation of carboxylic acid group on the HGN, and (d) Conjugation of polyclonal antibody through EDC/NHS coupling chemistry.

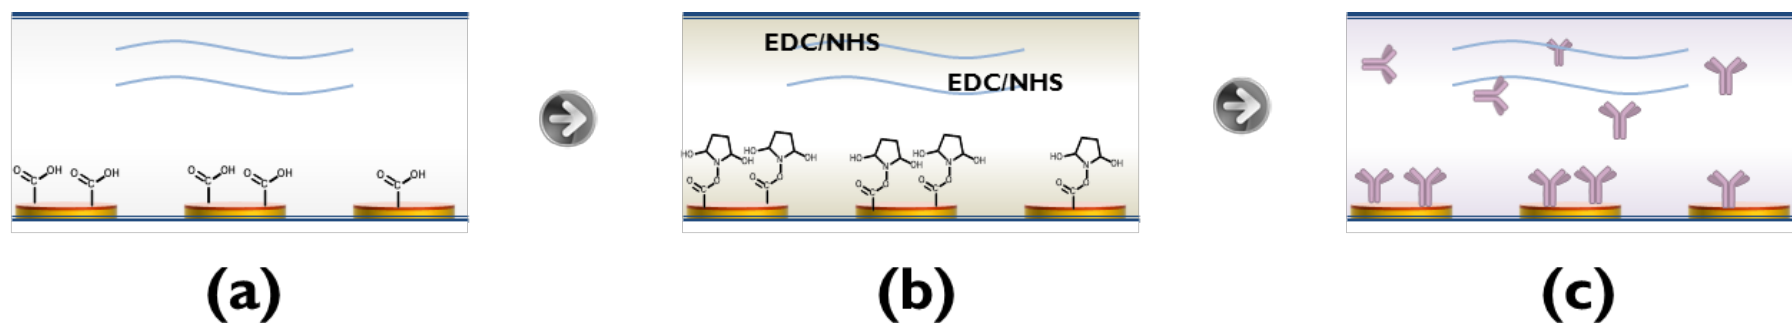

Figure S3. Schematic illustrations of the antibody conjugation process on the gold array wells embedded in a gradient microfluidic chip: (a) Preparation of carboxylic acid group on the gold array surface, (b) Activation of carboxylic acid group by NHS/EDC solution, and (c) Capture antibodies conjugation on the EDC-activated gold array surface.
